# Supplementary material
Source: PubMed Central journal article supplement (PMC4290797)
Supplement: Supp_Data.pdf [file Supp_Data.pdf]

## Supplementary Data

SUPPLEMENTARY TABLE S1. FIFTY TWO GENES SIGNIFICANTLY DIFFERENTIALLY EXPRESSED DURING hPDLSCs OSTEOGENIC DIFFERENTIATION ACROSS SECOND AND THIRD WEEKS VERSUS FIRST WEEK

| <i>ID</i>      | <i>Second week<br/>diff. relative<br/>fold change</i> | <i>Third week<br/>diff. relative<br/>fold change</i> | <i>Entrez gene name</i>                                                                  | <i>Location</i>     | <i>Type</i>             |
|----------------|-------------------------------------------------------|------------------------------------------------------|------------------------------------------------------------------------------------------|---------------------|-------------------------|
| <i>ARSE</i>    | 0.9866                                                | 1.7289                                               | Arylsulfatase E (chondrodysplasia punctata 1)                                            | Cytoplasm           | Enzyme                  |
| <i>BMP2</i>    | 2.4948                                                | 2.7955                                               | Bone morphogenetic protein 2                                                             | Extracellular space | Growth factor           |
| <i>BMP4</i>    | 0.9928                                                | 4.4727                                               | Bone morphogenetic protein 4                                                             | Extracellular space | Growth factor           |
| <i>BMP6</i>    | 1.2787                                                | 2.8487                                               | Bone morphogenetic protein 6                                                             | Extracellular space | Growth factor           |
| <i>CDH11</i>   | 1.2693                                                | 1.754                                                | Cadherin 11, type 2, OB-cadherin (osteoblast)                                            | Plasma membrane     | Other                   |
| <i>COL10A1</i> | 4.1194                                                | 7.2766                                               | Collagen, type X, alpha 1                                                                | Extracellular space | Other                   |
| <i>COL11A1</i> | 1.0541                                                | 2.3169                                               | Collagen, type XI, alpha 1                                                               | Extracellular space | Other                   |
| <i>COL16A1</i> | 2.0394                                                | 1.7852                                               | Collagen, type XVI, alpha 1                                                              | Extracellular space | Other                   |
| <i>COL18A1</i> | 1.0079                                                | 1.7891                                               | Collagen, type XVIII, alpha 1                                                            | Extracellular space | Other                   |
| <i>COL1A2</i>  | 1.0293                                                | 1.7793                                               | Collagen, type I, alpha 2                                                                | Extracellular Space | Other                   |
| <i>COL4A5</i>  | 2.5319                                                | 10.9185                                              | Collagen, type IV, alpha 5                                                               | Extracellular space | Other                   |
| <i>COL7A1</i>  | 1.0041                                                | 1.7584                                               | Collagen, type VII, alpha 1                                                              | Extracellular space | Other                   |
| <i>CSF2</i>    | 6.5024                                                | 3.5881                                               | Colony-stimulating factor 2 (granulocyte macrophage)                                     | Extracellular space | Cytokine                |
| <i>EGFR</i>    | 2.073                                                 | 2.2444                                               | Epidermal growth factor receptor                                                         | Plasma membrane     | KINASE                  |
| <i>FGF1</i>    | 2.02                                                  | 2.2116                                               | Fibroblast growth factor 1 (acidic)                                                      | Extracellular space | Growth factor           |
| <i>FGF2</i>    | 2.0607                                                | 2.2405                                               | Fibroblast growth factor 2 (basic)                                                       | Extracellular space | Growth factor           |
| <i>FGFR1</i>   | 0.9946                                                | 1.7529                                               | Fibroblast growth factor receptor 1                                                      | Plasma membrane     | Kinase                  |
| <i>IGF1R</i>   | 2.027                                                 | 2.2405                                               | Insulin-like growth factor 1 receptor                                                    | Plasma membrane     | Transmembrane receptor  |
| <i>MGP</i>     | 0.3129                                                | 3.4692                                               | Matrix Gla protein                                                                       | Extracellular space | Other                   |
| <i>MINPP1</i>  | 1.5975                                                | 1.7593                                               | Multiple inositol-polyphosphate phosphatase 1                                            | Cytoplasm           | phosphatase             |
| <i>MMP2</i>    | 0.9768                                                | 2.1963                                               | Matrix metalloproteinase 2 (gelatinase A, 72 kDa gelatinase, 72 kDa type IV collagenase) | Extracellular space | Peptidase               |
| <i>MSX2</i>    | 1.6212                                                | 1.782                                                | Msh homeobox 2                                                                           | Nucleus             | Transcription regulator |
| <i>PHEX</i>    | 2.0832                                                | 1.8093                                               | Phosphate-regulating endopeptidase homolog, X-linked                                     | Cytoplasm           | Peptidase               |
| <i>RUNX2</i>   | 2.0809                                                | 2.2704                                               | Runt-related transcription factor 2                                                      | Nucleus             | Transcription regulator |
| <i>SMAD1</i>   | 1.6078                                                | 1.7603                                               | SMAD family member 1                                                                     | Nucleus             | Transcription regulator |
| <i>SMAD3</i>   | 0.9938                                                | 2.2232                                               | SMAD family member 3                                                                     | Nucleus             | Transcription regulator |
| <i>SMAD4</i>   | 2.0546                                                | 1.7857                                               | SMAD family member 4                                                                     | Nucleus             | Transcription regulator |
| <i>SMAD5</i>   | 2.0278                                                | 2.2448                                               | SMAD family member 5                                                                     | Nucleus             | Transcription regulator |
| <i>SMAD7</i>   | 2.0351                                                | 2.2521                                               | SMAD family member 7                                                                     | Nucleus             | Transcription regulator |
| <i>SOX9</i>    | 1.0118                                                | 1.8277                                               | SRY (sex-determining region Y)-box 9                                                     | Nucleus             | Transcription regulator |
| <i>SPARC</i>   | 1.2671                                                | 1.7671                                               | Secreted protein, acidic, cysteine-rich (osteonectin)                                    | Extracellular space | Other                   |
| <i>TFIP11</i>  | 2.0258                                                | 1.773                                                | Tuftelin-interacting protein 11                                                          | Extracellular space | Other                   |
| <i>TGFβ2</i>   | 1.6429                                                | 1.7789                                               | Transforming growth factor, beta 2                                                       | Extracellular space | Growth factor           |
| <i>TGFβ3</i>   | 0.9974                                                | 1.7379                                               | Transforming growth factor, beta 3                                                       | Extracellular space | Growth factor           |
| <i>TGFβR2</i>  | 4.0929                                                | 4.5329                                               | Transforming growth factor, beta receptor II (70/80 kDa)                                 | Plasma membrane     | Kinase                  |
| <i>TUFT1</i>   | 3.1675                                                | 3.4885                                               | Tuftelin 1                                                                               | Unknown             | Other                   |
| <i>TWIST2</i>  | 4.0667                                                | 4.4251                                               | Twist basic helix-loop-helix transcription factor 2                                      | Nucleus             | Transcription regulator |
| <i>VDR</i>     | 2.0417                                                | 1.7435                                               | Vitamin D (1,25-dihydroxyvitamin D3) receptor                                            | Nucleus             | Transcription regulator |
| <i>VEGFA</i>   | 2.026                                                 | 1.103                                                | Vascular endothelial growth factor A                                                     | Extracellular space | Growth factor           |

(continued)

SUPPLEMENTARY TABLE S1. (CONTINUED)

| <i>ID</i>      | <i>Second week<br/>diff. relative<br/>fold change</i> | <i>Third week<br/>diff. relative<br/>fold change</i> | <i>Entrez gene name</i>                                | <i>Location</i>     | <i>Type</i>             |
|----------------|-------------------------------------------------------|------------------------------------------------------|--------------------------------------------------------|---------------------|-------------------------|
| <i>COL15A1</i> | 0.5101                                                | 0.4546                                               | Collagen, type XV, alpha 1                             | Extracellular space | Other                   |
| <i>COL3A1</i>  | 0.5126                                                | 0.7036                                               | Collagen, type III, alpha 1                            | Extracellular space | Other                   |
| <i>COL5A1</i>  | 0.6375                                                | 1.1102                                               | Collagen, type V, alpha 1                              | Extracellular space | Other                   |
| <i>COL9A2</i>  | 0.6386                                                | 1.1058                                               | Collagen, type IX, alpha 2                             | Extracellular space | Other                   |
| <i>GUSB</i>    | 0.4955                                                | 0.8772                                               | Glucuronidase, beta                                    | Cytoplasm           | Enzyme                  |
| <i>IGF2</i>    | 0.5119                                                | 0.5661                                               | Insulin-like growth factor 2<br>(somatomedin A)        | Extracellular space | Growth factor           |
| <i>SMAD9</i>   | 0.5047                                                | 1.1211                                               | SMAD family member 9                                   | Nucleus             | Transcription regulator |
| <i>TGFβ1</i>   | 0.5138                                                | 0.8721                                               | Transforming growth factor, beta 1                     | Extracellular space | Growth factor           |
| <i>TGFβR1</i>  | 0.6201                                                | 0.6964                                               | Transforming growth factor, beta<br>receptor 1         | Plasma membrane     | Kinase                  |
| <i>TWIST1</i>  | 0.4623                                                | 0.8625                                               | Twist basic helix-loop-helix<br>transcription factor 1 | Nucleus             | Transcription regulator |
| <i>MSX1</i>    | 0.6545                                                | 1.8571                                               | Msh homeobox 1                                         | Nucleus             | Transcription regulator |
| <i>SMAD6</i>   | 0.6339                                                | 1.3978                                               | SMAD family member 6                                   | Nucleus             | Transcription regulator |
| <i>VEGFC</i>   | 2.0305                                                | 0.1379                                               | Vascular endothelial growth<br>factor C                | Extracellular space | Growth factor           |

Expression values are the relative fold changes calculated as  $2^{-\Delta\Delta C_t}$ . Genes showing fold changes  $<0.7$  were considered significantly down-expressed; genes showing fold changes  $>1.4$  were considered significantly up-expressed.  
hPDLSCs, human periodontal ligament stem cells.

SUPPLEMENTARY TABLE S2. RELATIVE FOLD CHANGES OF THE 52 GENES AT SECOND AND THIRD WEEKS VERSUS FIRST WEEK IN UNDIFFERENTIATED hPDLSCs, SIGNIFICANTLY EXPRESSED IN DIFFERENTIATED hPDLSCs

| <i>ID</i>      | <i>Second week undiff. relative fold change</i> | <i>Third week undifferentiated expression</i> | <i>Entrez gene name</i>                                                                  | <i>Location</i>     | <i>Type</i>             |
|----------------|-------------------------------------------------|-----------------------------------------------|------------------------------------------------------------------------------------------|---------------------|-------------------------|
| <i>ARSE</i>    | 1.2657                                          | 0.7689                                        | Arylsulfatase E (chondrodysplasia punctata 1)                                            | Cytoplasm           | Enzyme                  |
| <i>BMP2</i>    | 0.6221                                          | 0.6084                                        | Bone morphogenetic protein 2                                                             | Extracellular space | Growth factor           |
| <i>BMP4</i>    | 1.0046                                          | 1.2438                                        | Bone morphogenetic protein 4                                                             | Extracellular space | Growth factor           |
| <i>BMP6</i>    | 1.014                                           | 1.2512                                        | Bone morphogenetic protein 6                                                             | Extracellular space | Growth factor           |
| <i>CDH11</i>   | 0.3963                                          | 0.7763                                        | Cadherin 11, type 2, OB-cadherin (osteoblast)                                            | Plasma membrane     | Other                   |
| <i>COL10A1</i> | 0.1537                                          | 0.295                                         | Collagen, type X, alpha 1                                                                | Extracellular space | Other                   |
| <i>COL11A1</i> | 0.4865                                          | 0.9957                                        | Collagen, type XI, alpha 1                                                               | Extracellular space | Other                   |
| <i>COL16A1</i> | 0.6233                                          | 0.7728                                        | Collagen, type XVI, alpha 1                                                              | Extracellular space | Other                   |
| <i>COL18A1</i> | 0.6154                                          | 0.7705                                        | Collagen, type XVIII, alpha 1                                                            | Extracellular space | Other                   |
| <i>COL1A2</i>  | 0.967                                           | 1.2292                                        | Collagen, type I, alpha 2                                                                | Extracellular space | Other                   |
| <i>COL4A5</i>  | 0.9996                                          | 0.6236                                        | Collagen, type IV, alpha 5                                                               | Extracellular space | Other                   |
| <i>COL7A1</i>  | 0.4893                                          | 0.9699                                        | Collagen, type VII, alpha 1                                                              | Extracellular space | Other                   |
| <i>CSF2</i>    | NS                                              | NS                                            | Colony stimulating factor 2 (granulocyte-macrophage)                                     | Extracellular Space | Cytokine                |
| <i>EGFR</i>    | 0.9935                                          | 0.9758                                        | Epidermal growth factor receptor                                                         | Plasma membrane     | Kinase                  |
| <i>FGF1</i>    | 1.0007                                          | 0.6194                                        | Fibroblast growth factor 1 (acidic)                                                      | Extracellular space | Growth factor           |
| <i>FGF2</i>    | 1.2462                                          | 0.9724                                        | Fibroblast growth factor 2 (basic)                                                       | Extracellular space | Growth factor           |
| <i>FGF1R1</i>  | 1.0051                                          | 1.2308                                        | Fibroblast growth factor receptor 1                                                      | Plasma membrane     | Kinase                  |
| <i>IGF1R</i>   | 0.9946                                          | 0.7747                                        | Insulin-like growth factor 1 receptor                                                    | Plasma membrane     | Transmembrane receptor  |
| <i>MGP</i>     | 0.3077                                          | 0.7787                                        | Matrix Gla protein                                                                       | Extracellular space | Other                   |
| <i>MINPP1</i>  | 0.6145                                          | 0.7686                                        | Multiple inositol-polyphosphate phosphatase 1                                            | Cytoplasm           | Phosphatase             |
| <i>MMP2</i>    | 0.6196                                          | 0.7715                                        | Matrix metalloproteinase 2 (gelatinase A, 72 kDa gelatinase, 72 kDa type IV collagenase) | Extracellular space | Peptidase               |
| <i>MSX2</i>    | 1.0113                                          | 0.6146                                        | Msh homeobox 2                                                                           | Nucleus             | Transcription regulator |
| <i>PHEX</i>    | 1.9827                                          | 0.9921                                        | Phosphate-regulating endopeptidase homolog, X-linked                                     | Cytoplasm           | Peptidase               |
| <i>RUNX2</i>   | 0.9953                                          | 1.2278                                        | Runt-related transcription factor 2                                                      | Nucleus             | Transcription regulator |
| <i>SMAD1</i>   | 1.5994                                          | 1.2318                                        | SMAD family member 1                                                                     | Nucleus             | Transcription regulator |
| <i>SMAD3</i>   | 0.6249                                          | 0.7793                                        | SMAD family member 3                                                                     | Nucleus             | Transcription regulator |
| <i>SMAD4</i>   | 1.2582                                          | 1.2259                                        | SMAD family member 4                                                                     | Nucleus             | Transcription regulator |
| <i>SMAD5</i>   | 0.9958                                          | 0.6098                                        | SMAD family member 5                                                                     | Nucleus             | Transcription regulator |
| <i>SMAD7</i>   | 0.6148                                          | 0.6039                                        | SMAD family member 7                                                                     | Nucleus             | Transcription regulator |
| <i>SOX9</i>    | 0.6301                                          | 1.2157                                        | SRY (sex-determining region Y)-box 9                                                     | Nucleus             | Transcription regulator |
| <i>SPARC</i>   | 1.0079                                          | 0.5977                                        | Secreted protein, acidic, cysteine-rich (osteonectin)                                    | Extracellular space | Other                   |
| <i>TFIP11</i>  | 1.2618                                          | 0.7667                                        | Tuftelin-interacting protein 11                                                          | Extracellular space | Other                   |
| <i>TGFβ2</i>   | 1.0038                                          | 0.7836                                        | Transforming growth factor, beta 2                                                       | Extracellular space | Growth factor           |
| <i>TGFβ3</i>   | 0.7903                                          | 0.769                                         | Transforming growth factor, beta 3                                                       | Extracellular space | Growth factor           |
| <i>TGFβR2</i>  | 1.0029                                          | 0.7704                                        | Transforming growth factor, beta receptor II (70/80 kDa)                                 | Plasma membrane     | Kinase                  |
| <i>TUFT1</i>   | 0.99                                            | 0.6138                                        | Tuftelin 1                                                                               | Unknown             | Other                   |
| <i>TWIST2</i>  | 0.6324                                          | 0.7831                                        | Twist basic helix-loop-helix transcription factor 2                                      | Nucleus             | Transcription regulator |

(continued)

SUPPLEMENTARY TABLE S2. (CONTINUED)

| <i>ID</i>      | <i>Second week undiff. relative fold change</i> | <i>Third week undifferentiated expression</i> | <i>Entrez gene name</i>                             | <i>Location</i>     | <i>Type</i>             |
|----------------|-------------------------------------------------|-----------------------------------------------|-----------------------------------------------------|---------------------|-------------------------|
| <i>VDR</i>     | 0.9982                                          | 0.9868                                        | Vitamin D (1,25-dihydroxyvitamin D3) receptor       | Nucleus             | Transcription regulator |
| <i>VEGFA</i>   | 1.2647                                          | 0.6127                                        | Vascular endothelial growth factor A                | Extracellular space | Growth factor           |
| <i>COL15A1</i> | 0.5066                                          | 0.6227                                        | Collagen, type XV, alpha 1                          | Extracellular space | Other                   |
| <i>COL3A1</i>  | 1.0116                                          | 1.5838                                        | Collagen, type III, alpha 1                         | Extracellular space | Other                   |
| <i>COL5A1</i>  | 0.6255                                          | 1.2205                                        | Collagen, type V, alpha 1                           | Extracellular space | Other                   |
| <i>COL9A2</i>  | 0.784                                           | 0.9677                                        | collagen, type IX, alpha 2                          | Extracellular space | Other                   |
| <i>GUSB</i>    | 1.5802                                          | 1.2419                                        | Glucuronidase, beta                                 | Cytoplasm           | Enzyme                  |
| <i>IGF2</i>    | 0.6312                                          | 0.6016                                        | Insulin-like growth factor 2 (somatomedin A)        | Extracellular space | Growth factor           |
| <i>SMAD9</i>   | 1.2359                                          | 1.9674                                        | SMAD family member 9                                | Nucleus             | Transcription regulator |
| <i>TGFβ1</i>   | 12.1185                                         | 6.1893                                        | Transforming growth factor, beta 1                  | Extracellular space | Growth factor           |
| <i>TGFβR1</i>  | 1.0213                                          | 1.2443                                        | Transforming growth factor, beta receptor 1         | Plasma membrane     | Kinase                  |
| <i>TWIST1</i>  | 0.9602                                          | 1.2251                                        | Twist basic helix-loop-helix transcription factor 1 | Nucleus             | Transcription regulator |
| <i>MSX1</i>    | 0.2885                                          | 0.5788                                        | Msh homeobox 1                                      | Nucleus             | Transcription regulator |
| <i>SMAD6</i>   | 1.0003                                          | 1.2398                                        | SMAD family member 6                                | Nucleus             | Transcription regulator |
| <i>VEGFC</i>   | 2.5196                                          | 0.9752                                        | Vascular endothelial growth factor C                | Extracellular space | Growth factor           |

Expression values are the relative fold changes calculated as  $2^{-\Delta\Delta Ct}$ . Genes showing fold changes < 0.7 were considered significantly down-expressed; genes showing fold changes > 1.4 were considered significantly up-expressed.

NS, not significant.

SUPPLEMENTARY TABLE S3. EARLY UP-EXPRESSED  
GENES AT SECOND WEEK OF DIFFERENTIATION  
VERSUS FIRST WEEK

| <i>ID</i>      | <i>Second week<br/>diff. relative<br/>fold change</i> | <i>Third week<br/>diff. relative<br/>fold change</i> |
|----------------|-------------------------------------------------------|------------------------------------------------------|
| <i>BMP2</i>    | 2.4948                                                | 2.7955                                               |
| <i>COL10A1</i> | 4.1194                                                | 7.2766                                               |
| <i>COL16A1</i> | 2.0394                                                | 1.7852                                               |
| <i>COL4A5</i>  | 2.5319                                                | 10.9185                                              |
| <i>CSF2</i>    | 6.5024                                                | 3.5881                                               |
| <i>EGFR</i>    | 2.073                                                 | 2.2444                                               |
| <i>FGF1</i>    | 2.02                                                  | 2.2116                                               |
| <i>FGF2</i>    | 2.0607                                                | 2.2405                                               |
| <i>IGF1R</i>   | 2.027                                                 | 2.2405                                               |
| <i>MINPP1</i>  | 1.5975                                                | 1.7593                                               |
| <i>MSX2</i>    | 1.6212                                                | 1.782                                                |
| <i>PHEX</i>    | 2.0832                                                | 1.8093                                               |
| <i>RUNX2</i>   | 2.0809                                                | 2.2704                                               |
| <i>SMAD1</i>   | 1.6078                                                | 1.7603                                               |
| <i>SMAD4</i>   | 2.0546                                                | 1.7857                                               |
| <i>SMAD5</i>   | 2.0278                                                | 2.2448                                               |
| <i>SMAD7</i>   | 2.0351                                                | 2.2521                                               |
| <i>TFIP11</i>  | 2.0258                                                | 1.773                                                |
| <i>TGFβ2</i>   | 1.6429                                                | 1.7789                                               |
| <i>TGFβR2</i>  | 4.0929                                                | 4.5329                                               |
| <i>TUFT1</i>   | 3.1675                                                | 3.4885                                               |
| <i>TWIST2</i>  | 4.0667                                                | 4.4251                                               |
| <i>VDR</i>     | 2.0417                                                | 1.7435                                               |

Expression values are the relative fold changes calculated as  $2^{-\Delta\Delta C_t}$ . Genes showing fold changes <0.7 were considered significantly down-expressed; genes showing fold changes >1.4 were considered significantly up-expressed.

SUPPLEMENTARY TABLE S4. UP-EXPRESSED GENES ONLY AT THE THIRD WEEK OF DIFFERENTIATION VERSUS FIRST WEEK

| <i>ID</i>      | <i>Second week<br/>diff. relative<br/>fold change</i> | <i>Third week<br/>diff. relative<br/>fold change</i> |
|----------------|-------------------------------------------------------|------------------------------------------------------|
| <i>ARSE</i>    | 0.9866                                                | 1.7289                                               |
| <i>BMP4</i>    | 0.9928                                                | 4.4727                                               |
| <i>BMP6</i>    | 1.2787                                                | 2.8487                                               |
| <i>CDH11</i>   | 1.2693                                                | 1.754                                                |
| <i>COL11A1</i> | 1.0541                                                | 2.3169                                               |
| <i>COL18A1</i> | 1.0079                                                | 1.7891                                               |
| <i>COL1A2</i>  | 1.0293                                                | 1.7793                                               |
| <i>COL7A1</i>  | 1.0041                                                | 1.7584                                               |
| <i>FGFR1</i>   | 0.9946                                                | 1.7529                                               |
| <i>MGP</i>     | 0.3129                                                | 3.4692                                               |
| <i>MMP2</i>    | 0.9768                                                | 2.1963                                               |
| <i>SMAD3</i>   | 0.9938                                                | 2.2232                                               |
| <i>SOX9</i>    | 1.0118                                                | 1.8277                                               |
| <i>SPARC</i>   | 1.2671                                                | 1.7671                                               |
| <i>TGFβ3</i>   | 0.9974                                                | 1.7379                                               |

Expression values are the relative fold changes calculated as  $2^{-\Delta\Delta C_t}$ . Genes showing fold changes <0.7 were considered significantly down-expressed; genes showing fold changes >1.4 were considered significantly up-expressed.
